# Supplementary material for: The Traditional Chinese Medicine Kangai Injection as an Adjuvant Method in Combination with Chemotherapy for the Treatment of Breast Cancer in Chinese Patients: A Meta‐Analysis
Source: Hindawi journal article supplement (doi:10.1155/2018/6305645), 2018-01-01

Meta-analysis estimates, given named study is omitted

| Lower CI Limit      ○ Estimate      | Upper CI Limit

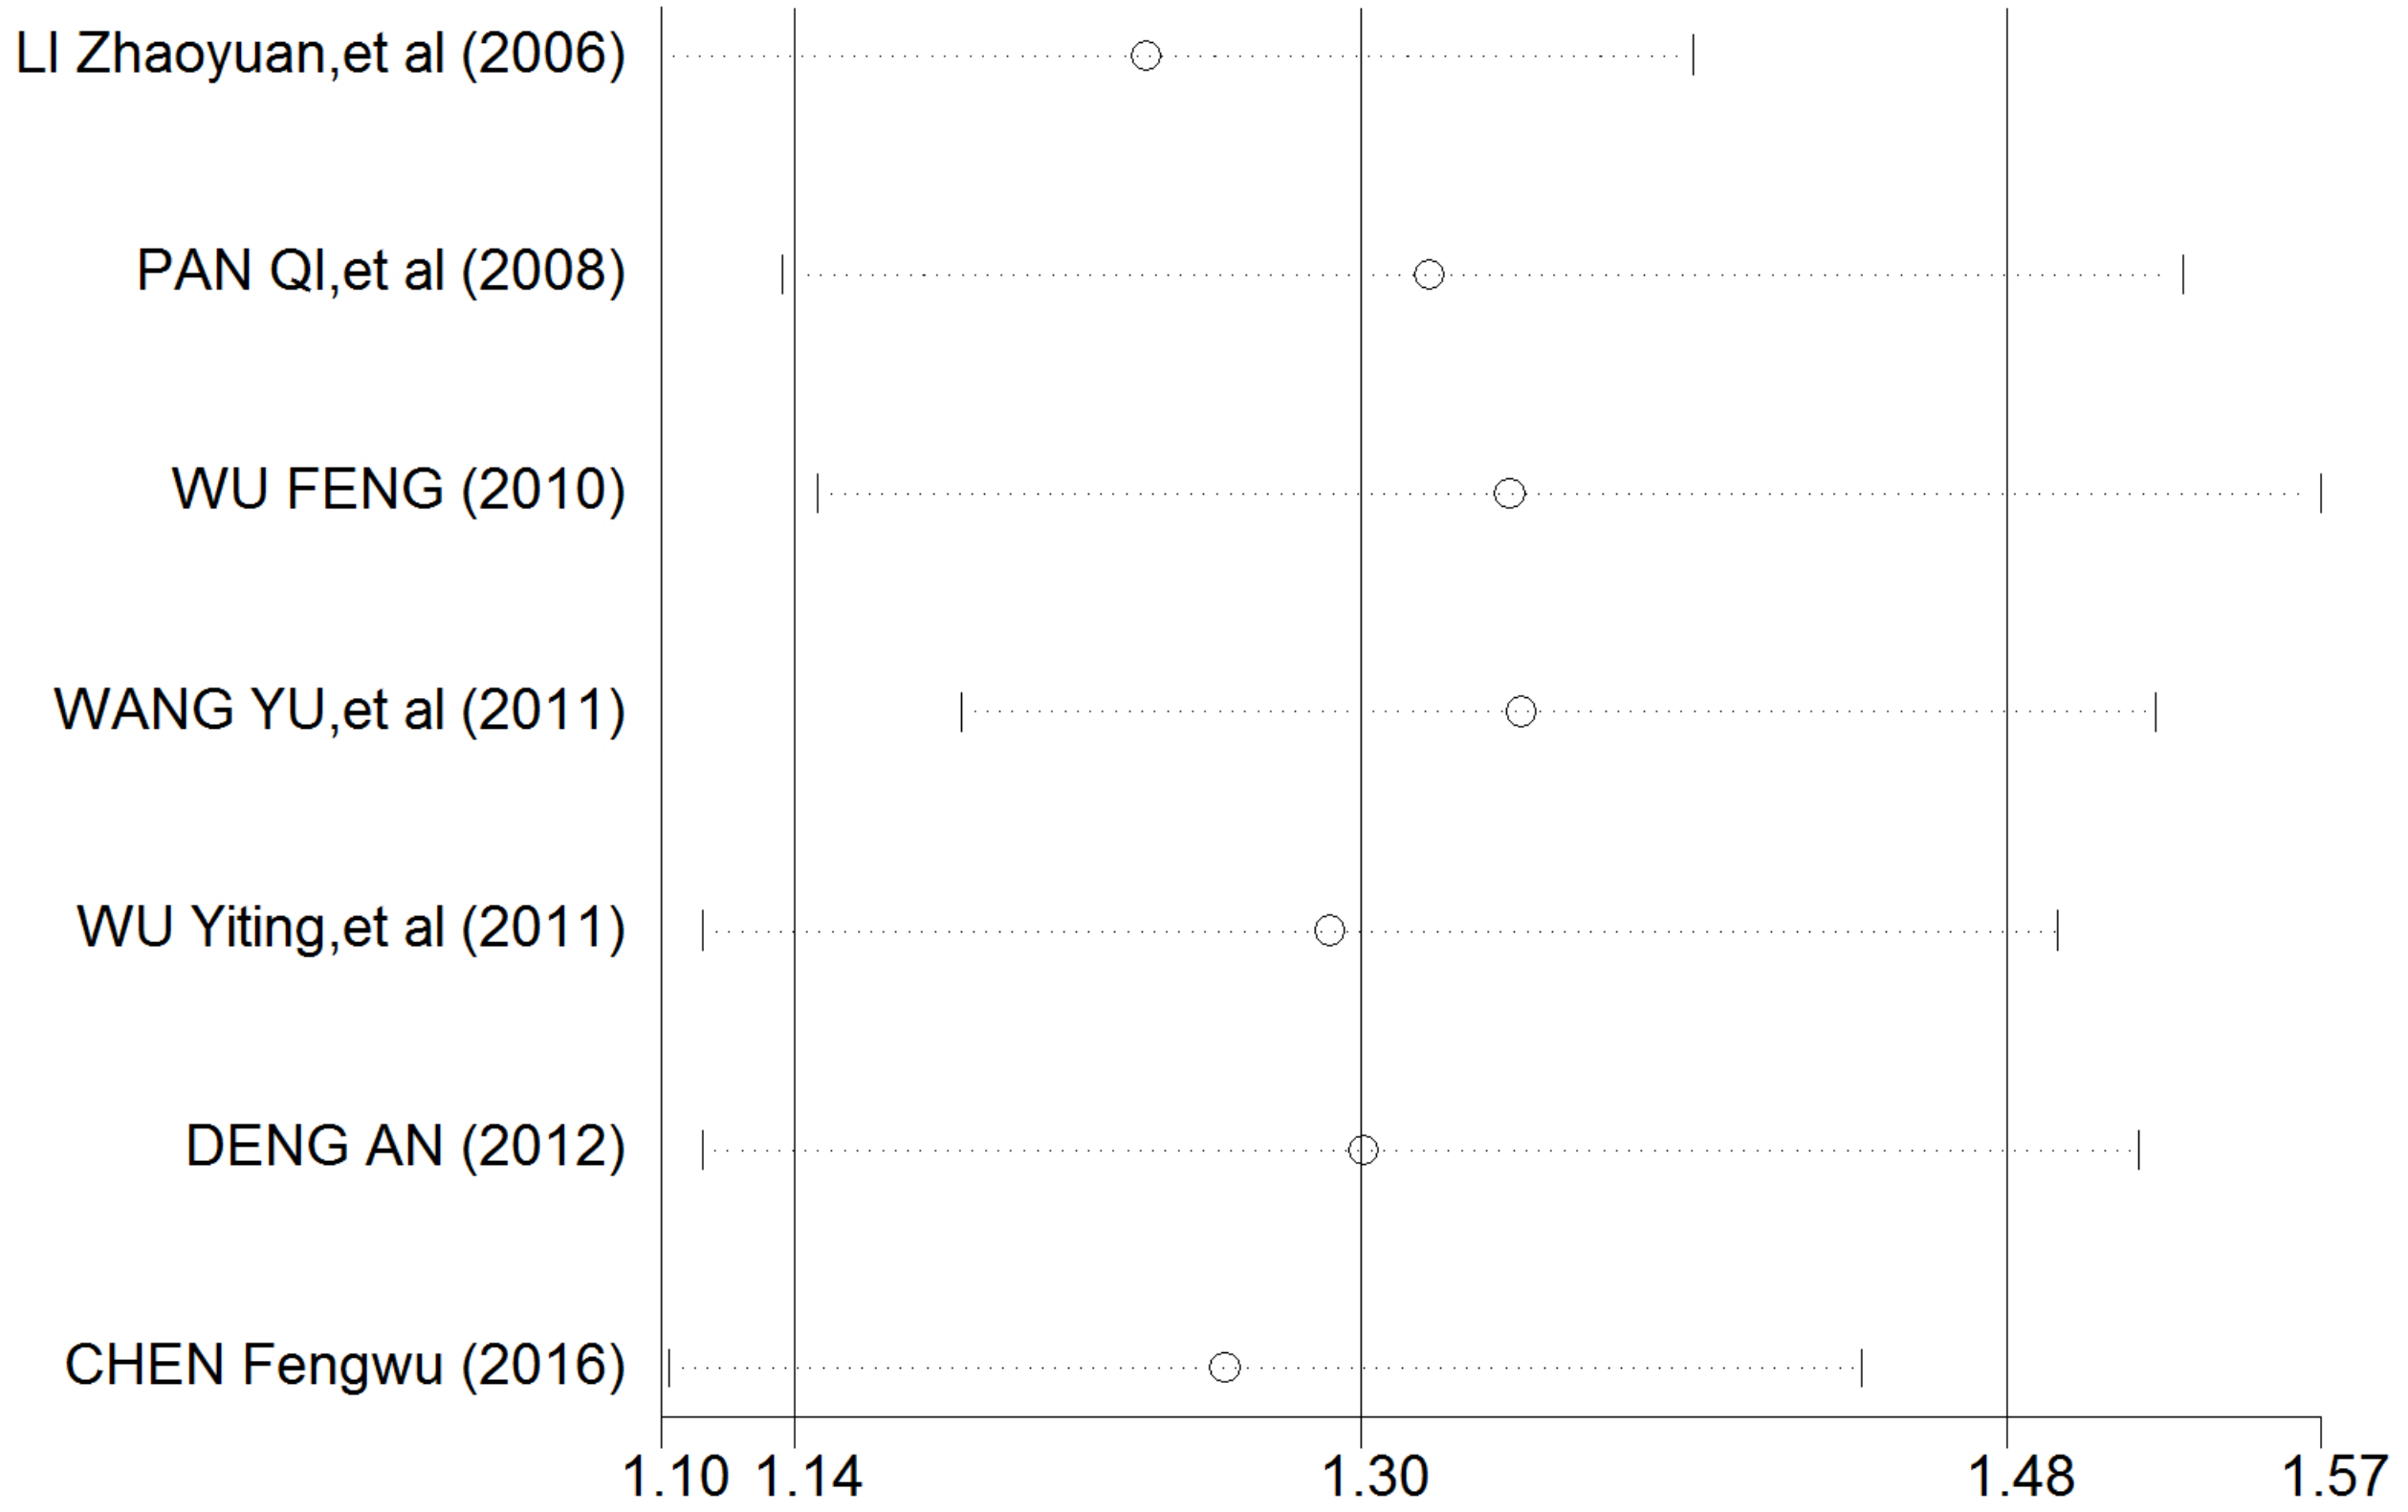

Supplement: f2 [file 6305645.f2.pdf]
